# Supplementary material for: A genetically attenuated malaria vaccine candidate based on P. falciparum b9/slarp gene-deficient sporozoites
Source: eLife. 2014 Nov 19;3:e03582. doi: 10.7554/eLife.03582 (PMC4273440; doi:10.7554/eLife.03582)
Supplement: Supplementary file 2. — Primer sequences. DOI: http://dx.doi.org/10.7554/eLife.03582.012 [file elife03582s002.xlsx]

## Sheet: Sheet1
Supplementary file 2a: Primers used in this study for generation and analysis of the P. berghei mutants Pb∆slarp and Pb∆b9∆slarp
	Name	Sequence		Restriction site	Description	Gene models
Primers for the Anchor-tagging PCR-based method: Generation of ∆slarp target regions (for pL1740) (restriction sites are shown in red; Anchor tags are shown in blue)
∆slarp	5960	GAACTCGTACTCCTTGGTGACGGGTACCGGGAGTCAAAAACGGTATGC	Asp718		∆slarp 5' target F	PBANKA_090210
∆slarp	5961	CATCTACAAGCATCGTCGACCTCTCCTATAGTACATGCCCACG			∆slarp 5'target R	PBANKA_090210
∆slarp	5962	CCTTCAATTTCGGATCCACTAGCATGTTAGGAGCACGAAACC			∆slarp 3' target F	PBANKA_090210
∆slarp	5963	AGGTTGGTCATTGACACTCAGCAGTACTCTAAAATTGTGGGAATCCACTTG	ScaI		∆slarp 3' target R	PBANKA_090210
	4661	GAACTCGTACTCCTTGGTGACG			for 2nd PCR
	4662	AGGTTGGTCATTGACACTCAGC			for 2nd PCR
Primers for confirmation PCR of the integration event in ∆slarp (Anchor tags are shown in blue)
∆slarp	6125	CATGTCTCTTTGCATGTGGC			∆slarp 5' integration F	PBANKA_090210
∆slarp	6349	CTCATCTACAAGCATCGTCG			∆slarp 5' integration R
∆slarp	4771	CCTTCAATTTCGGATCCACTAG			∆slarp 3' integration F
∆slarp	6126	GTCGTCCTATAGTAAGTTGAGC			∆slarp 3' integration R	PBANKA_090210
∆slarp	6127	CCCAAATGATCAAGCACCAG			slarp orf F	PBANKA_090210
∆slarp	6128	CAATTTGAATCGGCACAAGGC			slarp orf R	PBANKA_090210
	6346	TGGACATTGCCTATGAGGAG			hdhfr-yfcu F
	6347	AACACAGTAGTATCTGTCACC			hdhfr-yfcu R
∆b9	4437	CGCATTATTCGAGGTAGACC			b9 orf F	PBANKA_080810
∆b9	4438	ACGGGTTTCACTTACATACTC			b9 orf R	PBANKA_080810
Supplementary file 2b: Primers used in this study for generation and analysis of the P. falciparum mutants Pf∆slarp and Pf∆b9∆slarp
	Name	Sequence	Restriction site	Description	Gene models
Primers for generation of the Pf∆slarp target regions
Pf∆slarp	BVS 179	tctacgtacggcacattttcaagataaatagatcattc	BsiWI	Pf∆slarp 5' target F	PF3D7_1147000
Pf∆slarp	BVS180	ctatgcgcgcgttgatatttttataactgacctagtg	BssHII	Pf∆slarp 5' target R	PF3D7_1147000
Pf∆slarp	BVS 182	tctaccatgggaaattgttgataagaagaatacctttgg	NcoI	Pf∆slarp 3' target F	PF3D7_1147000
Pf∆slarp	BVS 184	catacccgggattccctcgtaacatttgtgaaag	XmaI	Pf∆slarp 3' target R	PF3D7_1147000
Primers for confirmation PCR of the integration event in Pf∆slarp
Pf∆slarp	P1 / BVS 208	aatgcacctgcatatgaatattaac		LR-PCR	PF3D7_1147000
Pf∆slarp	P2 / BVS 211	tgtcaaggggatttatggggatc		LR-PCR	PF3D7_1147000
Primers for generation of the Pf∆b9 target regions
Pf∆b9	BVS84	ctaccatggtatgggagcttgggcataatgtcatg	NcoI,	Pf∆b9 5' target F	PF3D7_0317100
Pf∆b9	BVS85	gtacccgggcgtgtcttatcatattcacaaaggc	XmaI	Pf∆b9 5'target R	PF3D7_0317100
Pf∆b9	BVS88	catacgcgtcctatatgatcaatcaccacctag	MluI	Pf∆b9 3' target F	PF3D7_0317100
Pf∆b9	BVS89	atagcgcgctgtctatcatacaaactggcatcc	BssHII	Pf∆b9 3' target R	PF3D7_0317100
Primers for confirmation PCR of the integration event in Pf∆b9
Pf∆b9	P3 / BVS 123	tcatgggtttttaaatagcctc		LR-PCR	PF3D7_0317100
Pf∆b9	P4 / BVS 125	gatgtacacctacatttgaatgaag		LR-PCR	PF3D7_0317100
Primers for RT-PCR (reverse transcriptase)
Pf∆slarp	BVS290	cgatcctccgttgtactgttc		RT-PCR	PF3D7_1147000
Pf∆slarp	BVS292	gaagaagataaatccgatggagatgatatg		RT-PCR	PF3D7_1147000
Pf∆b9	BVS286	tccacatggatgatatggtatgg		RT-PCR	PF3D7_0317100
Pf∆b9	BVS288	tgttgtgctcactagacgg		RT-PCR	PF3D7_0317100
18S rRNA	18Sf	gtaattggaatgataggaatttacaaggt		RT-PCR	18S rRNA
18S rRNA	18Sr	tcaactacgaacgttttaactgcaac		RT-PCR	18S rRNA
